# Supplementary material for: Endowing Acceptable Mechanical Properties of Segregated Conductive Polymer Composites with Enhanced Filler-Matrix Interfacial Interactions by Incorporating High Specific Surface Area Nanosized Carbon Black
Source: MDPI journal article supplement (doi:10.3390/nano11082074), 2021-08-16
Supplement: s1 [file s1]

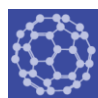

# Supplementary Materials: Endowing Acceptable Mechanical Properties of Segregated Conductive Polymer Composites with Enhanced Filler-Matrix Interfacial Interactions by Incorporating High Specific Surface Area Nanosized Carbon Black

Huibin Cheng <sup>1</sup>, Xiaoli Sun <sup>1</sup>, Baoquan Huang <sup>1</sup>, Liren Xiao <sup>2</sup>, Qinghua Chen <sup>1,2,3</sup>, Changlin Cao <sup>1,\*</sup> and Qingrong Qian <sup>1,2,3,\*</sup>

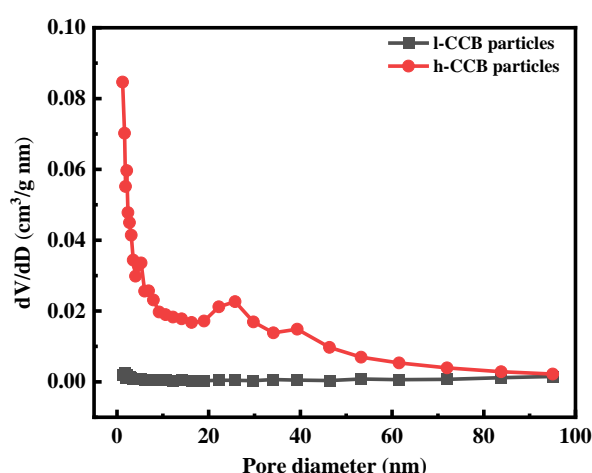

Figure S1. Pore size distributions of h-CCB and l-CCB nanoparticles.

Table S1. Physical properties of two types of conductive carbon black (CCB) nanoparticles.

| Sample                                 | $S_{\text{BET}}$ ( $\text{m}^2/\text{g}$ ) | $V_t$ ( $\text{cm}^3/\text{g}$ ) | Pore diameter (nm) |
|----------------------------------------|--------------------------------------------|----------------------------------|--------------------|
| high specific surface area CCB (h-CCB) | 380.83                                     | 1.7059                           | 17.918             |
| low specific surface area CCB (l-CCB)  | 8.52                                       | 0.0734                           | 34.456             |

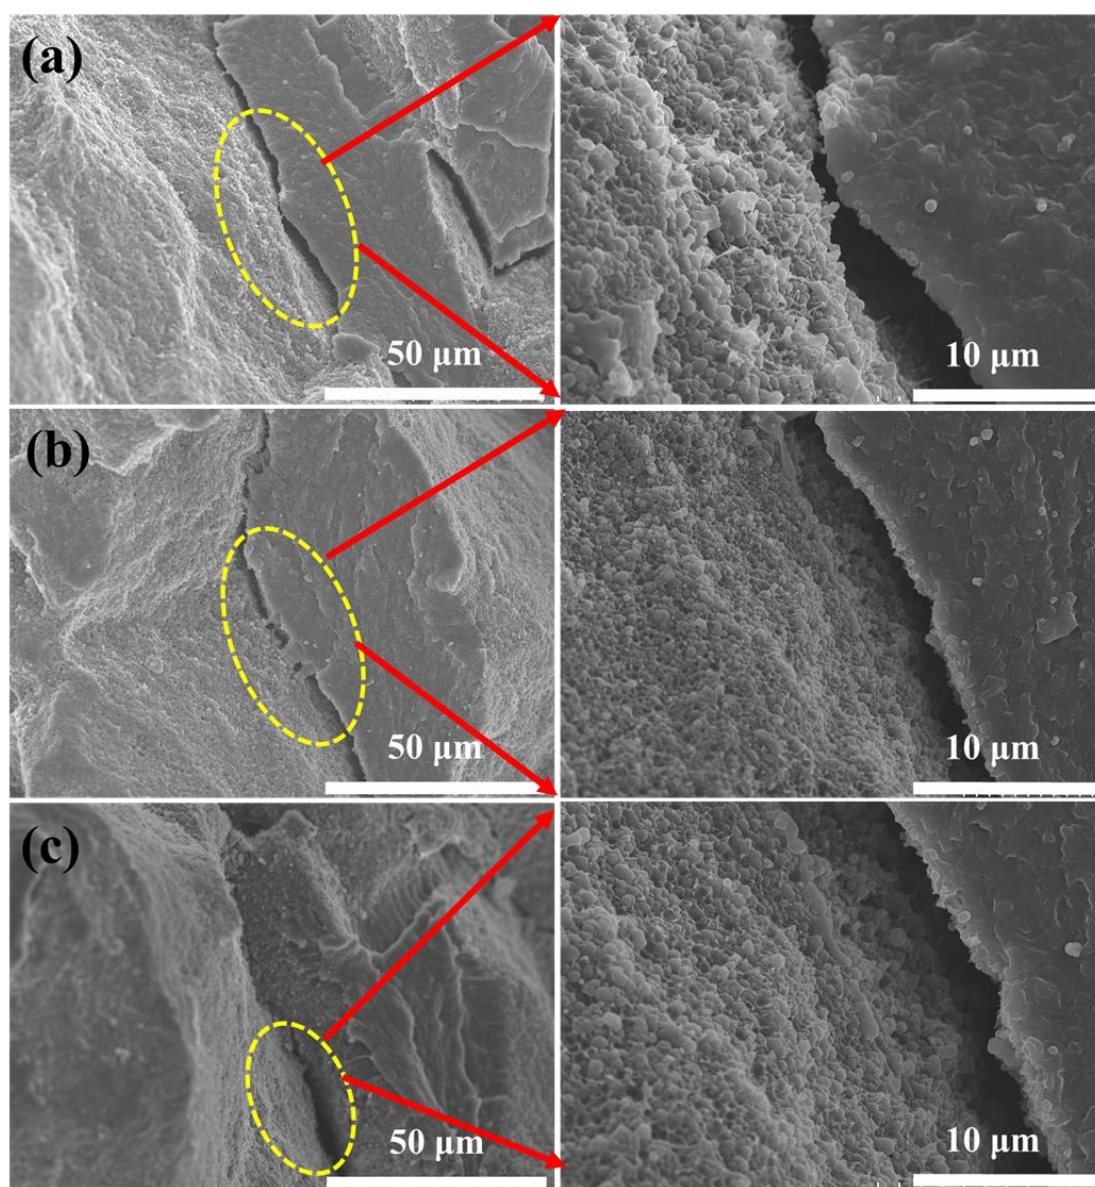

**Figure S2.** SEM morphologies of quenched section of the segregated UHMWPE composites with the different I-CCB content: (a) UHMWPE/I-CCB<sub>5</sub>, (b) UHMWPE/I-CCB<sub>7</sub>, (c) UHMWPE/I-CCB<sub>10</sub>.

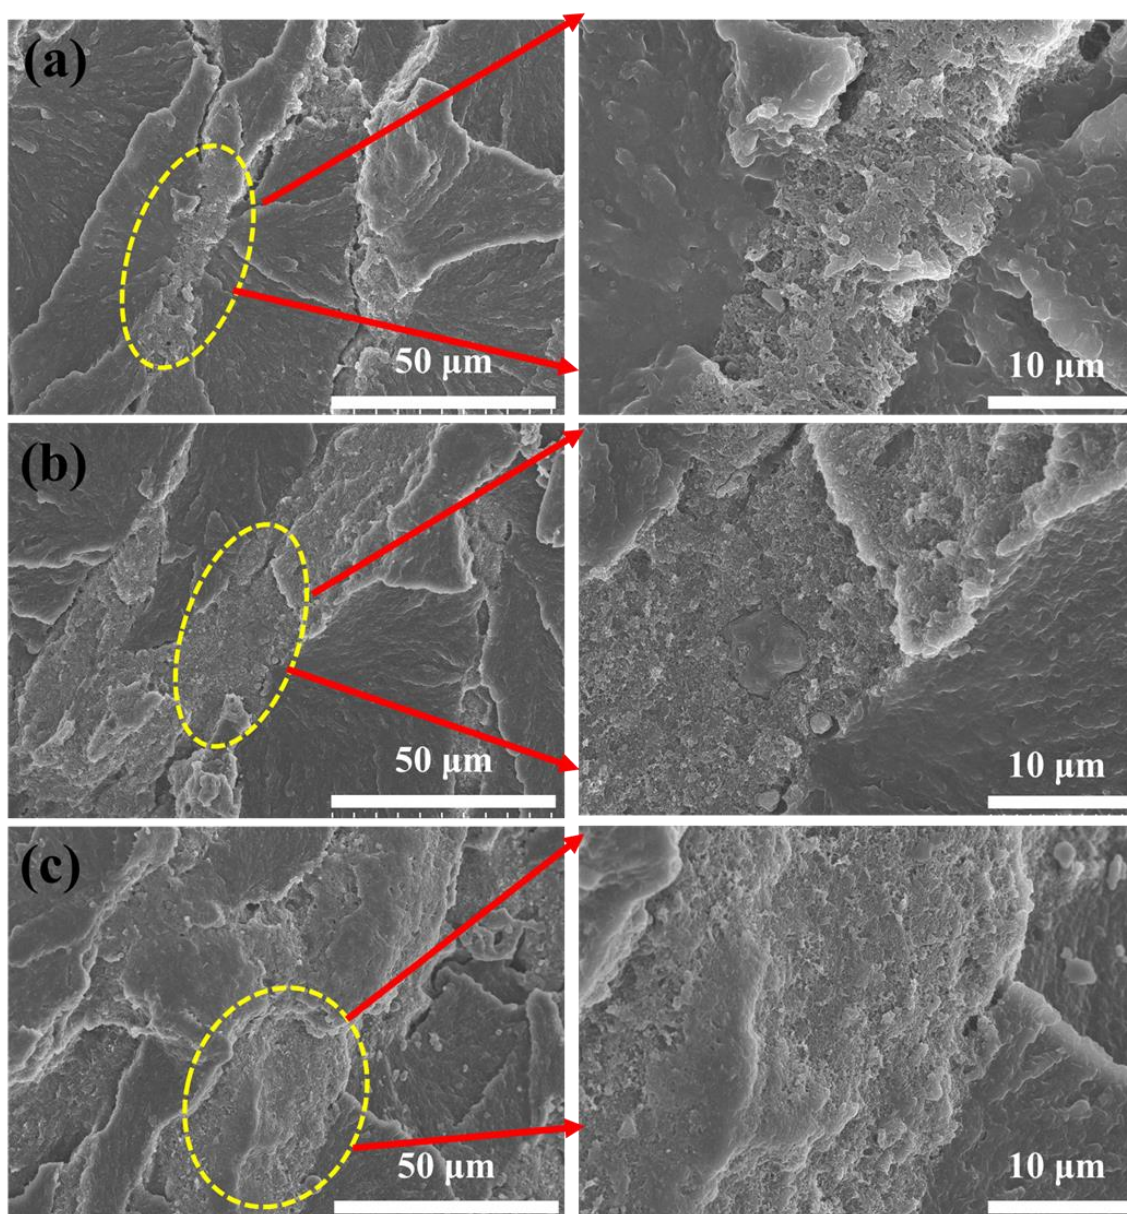

**Figure S3.** SEM morphologies of quenched section of the segregated UHMWPE composites with the different h-CCB content: (a) UHMWPE/h-CCB<sub>5</sub>, (b) UHMWPE/h-CCB<sub>7</sub>, (c) UHMWPE/h-CCB<sub>10</sub>.

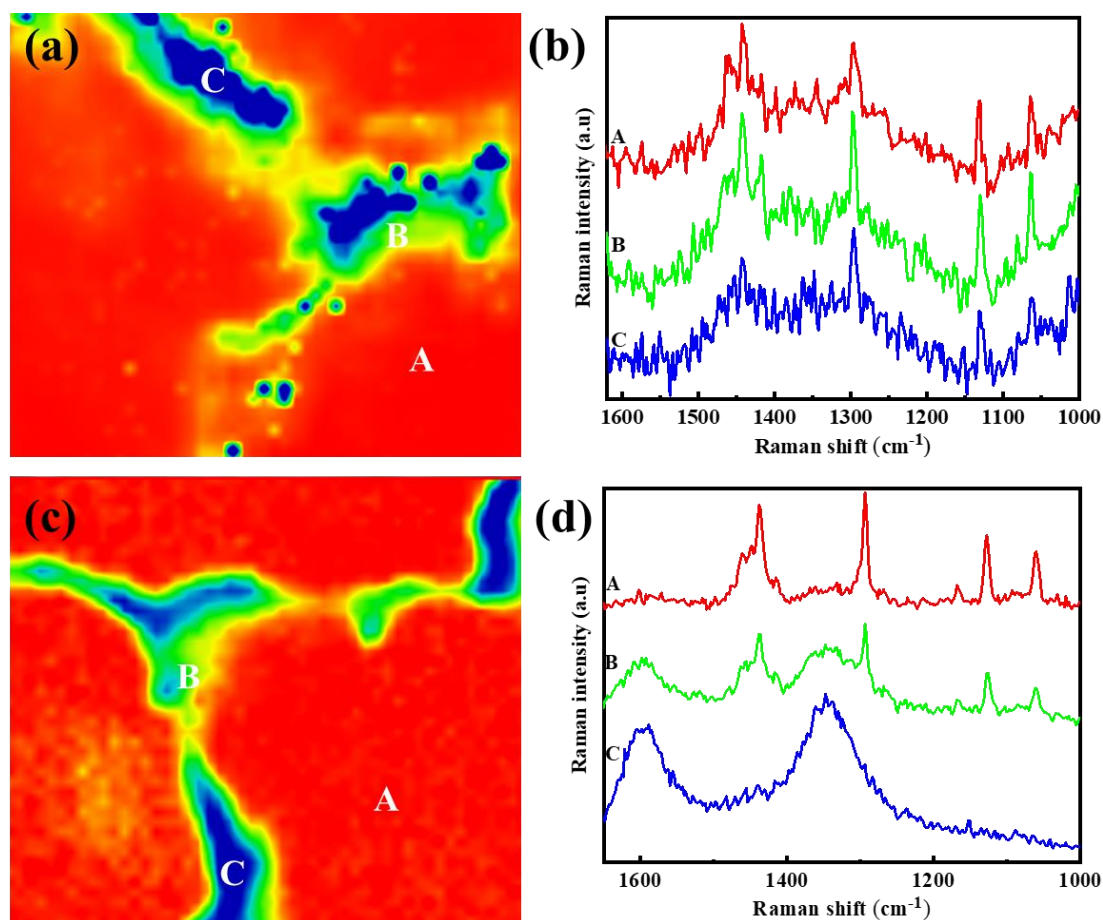

**Figure S4.** (a) Raman mapping images of the UHMWPE/l-CCB<sub>0.5</sub> composites, and (b) the corresponding Raman spectrum of comparison of UHMWPE/l-CCB<sub>0.5</sub> composite at the different position of Raman mapping images, (c) Raman mapping images of UHMWPE/h-CCB<sub>0.5</sub> composite, and (d) the corresponding Raman spectrum of comparison of UHMWPE/h-CCB<sub>0.5</sub> composite at the different position of Raman mapping images.

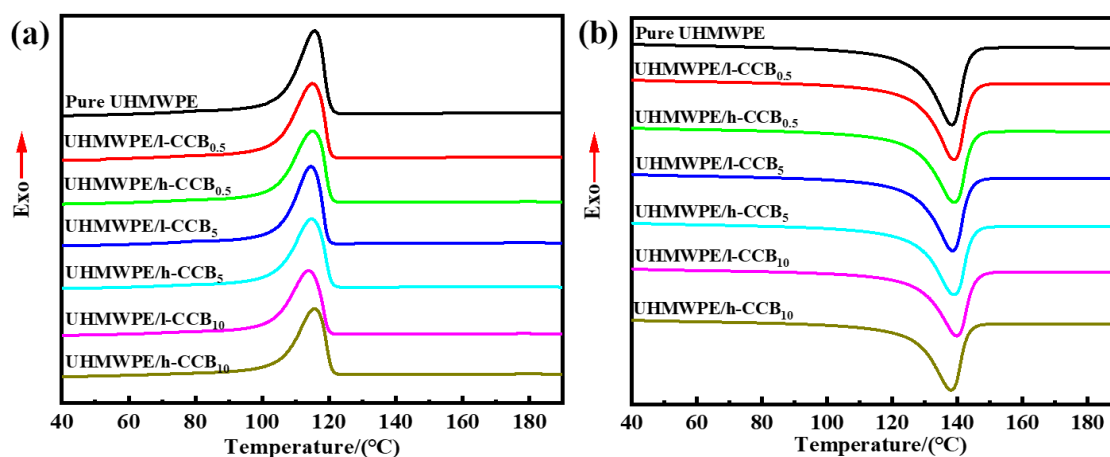

**Figure S5.** DSC curves of pure UHMWPE, UHMWPE/l-CCB and UHMWPE/h-CCB composites: (a) second heating curves; (b) cooling curves.

**Table S2.** DSC values of pure UHMWPE, UHMWPE/l-CCB and UHMWPE/h-CCB composites.

| Samples                     | T <sub>c</sub><br>(°C) | T <sub>c,onset</sub> (°C) | T <sub>m</sub><br>(°C) | ΔH <sub>m</sub><br>(J/g) | χ <sub>c</sub><br>(%) |
|-----------------------------|------------------------|---------------------------|------------------------|--------------------------|-----------------------|
| Pure UHMWPE                 | 115.63                 | 121.16                    | 138.37                 | 130.8                    | 44.9%                 |
| UHMWPE/l-CCB <sub>0.5</sub> | 114.93                 | 120.73                    | 139.00                 | 129.0                    | 44.5%                 |
| UHMWPE/l-CCB <sub>1</sub>   | 114.34                 | 119.77                    | 139.94                 | 128.6                    | 44.7%                 |

|                             |        |        |        |       |       |
|-----------------------------|--------|--------|--------|-------|-------|
| UHMWPE/l-CCB <sub>3</sub>   | 115.20 | 120.18 | 138.85 | 123.7 | 43.9% |
| UHMWPE/l-CCB <sub>5</sub>   | 114.53 | 120.46 | 138.62 | 123.3 | 44.8% |
| UHMWPE/l-CCB <sub>10</sub>  | 113.84 | 119.71 | 139.91 | 110.7 | 42.4% |
| UHMWPE/h-CCB <sub>0.5</sub> | 115.01 | 121.00 | 139.07 | 128.8 | 44.5% |
| UHMWPE/h-CCB <sub>1</sub>   | 115.32 | 120.43 | 138.73 | 126.4 | 43.8% |
| UHMWPE/h-CCB <sub>3</sub>   | 115.16 | 120.60 | 138.97 | 123.1 | 43.6% |
| UHMWPE/h-CCB <sub>5</sub>   | 114.78 | 120.85 | 139.05 | 120.9 | 43.7% |
| UHMWPE/h-CCB <sub>10</sub>  | 115.64 | 120.71 | 138.12 | 110.0 | 42.0% |

The Samples of  $\chi_c$  is calculated by Equation (S1) [1–2]:

$$\chi_c = \frac{\Delta H_m}{(1 - \phi)\Delta H_m^0} \times 100\% \quad (\text{S1})$$

where  $\phi$  is the weight fraction of h-CCB or l-CCB in the composites,  $\Delta H_m$  is the melting enthalpy of UHMWPE/CCB composites, which was actually determined from the differential scanning calorimetry (DSC) curves, and  $\Delta H_m^0$  (291 J) is the melting enthalpy of 100% crystallized samples.

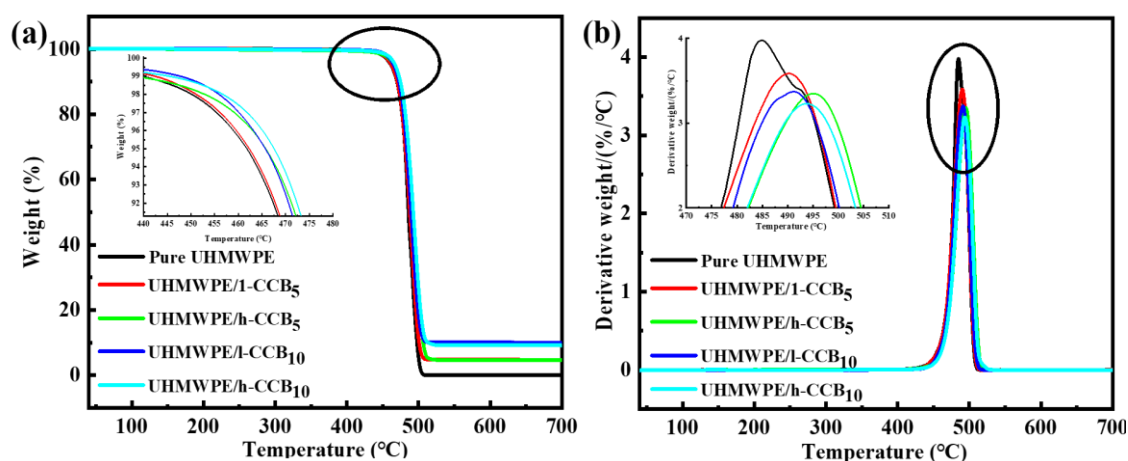

**Figure S6.** (a)TGA and (b) DTA curves of UHMWPE, UHMWPE/h-CCB and UHMWPE/l-CCB composites under nitrogen atmosphere.

**Table S3.** Thermal stabilities of pure UHMWPE, UHMWPE/h-CCB and UHMWPE/l-CCB composites obtained from TGA curves.

| Samples                     | T <sub>5</sub><br>(°C) | T <sub>30</sub><br>(°C) | T <sub>50</sub><br>(°C) | T <sub>max</sub><br>(°C) | T <sub>Heat-resistance index</sub><br>* (°C) | Residue at<br>700 °C<br>(wt%) |
|-----------------------------|------------------------|-------------------------|-------------------------|--------------------------|----------------------------------------------|-------------------------------|
| Pure UHMWPE                 | 453.58                 | 474.50                  | 479.46                  | 478.66                   | 228.40                                       | 0.03%                         |
| UHMWPE/l-CCB <sub>0.5</sub> | 456.85                 | 478.69                  | 485.12                  | 488.62                   | 230.28                                       | 0.23%                         |
| UHMWPE/l-CCB <sub>1</sub>   | 459.43                 | 480.13                  | 486.09                  | 488.17                   | 231.21                                       | 0.63%                         |
| UHMWPE/l-CCB <sub>3</sub>   | 462.02                 | 481.49                  | 487.07                  | 487.84                   | 232.11                                       | 2.69%                         |
| UHMWPE/l-CCB <sub>5</sub>   | 462.31                 | 481.56                  | 487.82                  | 490.21                   | 232.19                                       | 4.63%                         |
| UHMWPE/l-CCB <sub>10</sub>  | 465.70                 | 483.59                  | 489.81                  | 491.18                   | 233.45                                       | 9.99%                         |
| UHMWPE/h-CCB <sub>0.5</sub> | 457.80                 | 476.04                  | 482.08                  | 486.28                   | 229.68                                       | 0.22%                         |
| UHMWPE/h-CCB <sub>1</sub>   | 456.54                 | 479.72                  | 485.86                  | 488.84                   | 230.52                                       | 0.35%                         |
| UHMWPE/h-CCB <sub>3</sub>   | 465.47                 | 483.28                  | 489.76                  | 491.77                   | 233.32                                       | 2.61%                         |
| UHMWPE/h-CCB <sub>5</sub>   | 465.78                 | 485.77                  | 492.52                  | 495.04                   | 234.11                                       | 4.56%                         |
| UHMWPE/h-CCB <sub>10</sub>  | 467.55                 | 486.00                  | 492.65                  | 493.73                   | 234.52                                       | 9.17%                         |

The sample's heat-resistance index is calculated by Equation (S2) [3]:

$$*T_{\text{Heat-resistance index}} = 0.49*[T_5 + 0.6*(T_{30}-T_5)] \quad (\text{S2})$$

In which T<sub>5</sub>, T<sub>30</sub>, and T<sub>50</sub> are corresponding decomposition temperature of 5%, 30%, and 50% weight loss, respectively.

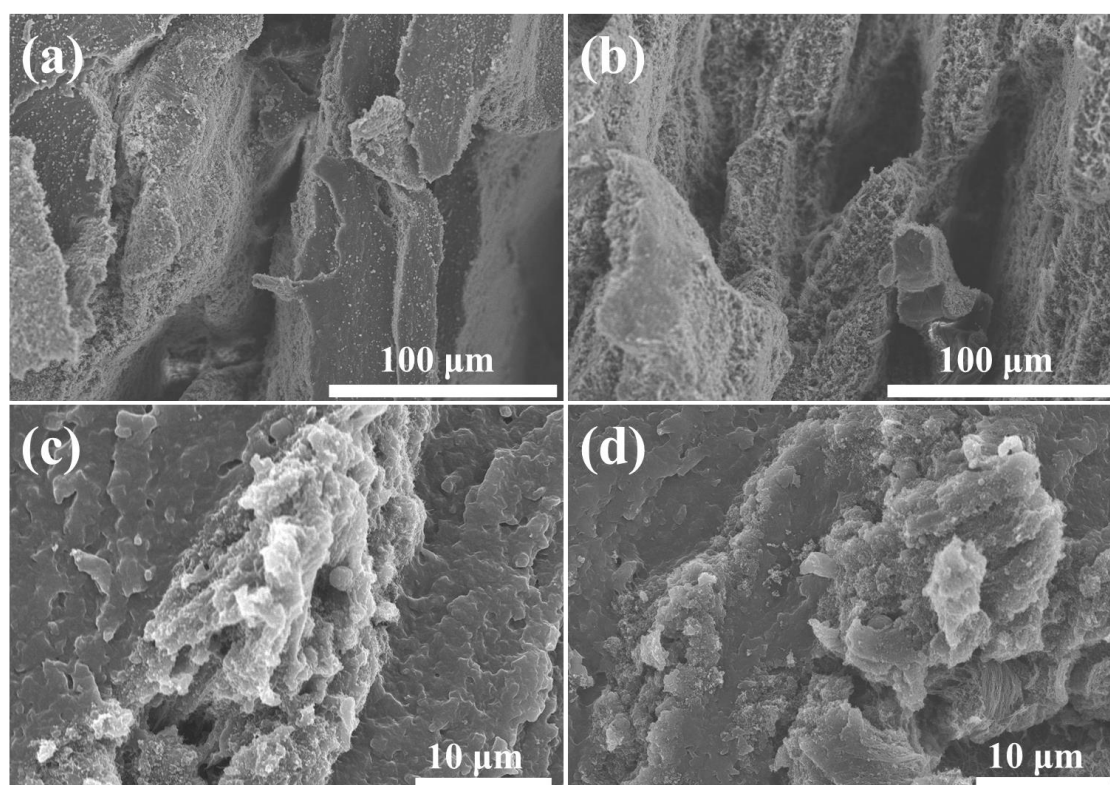

**Figure S7.** SEM micrographs of the tensile fractured surface of UHMWPE/l-CCB, and UHMWPE/h-CCB composites: (a) UHMWPE/l-CCB<sub>10</sub>, (b) UHMWPE/l-CCB<sub>15</sub>, (c) UHMWPE/h-CCB<sub>10</sub>, (d) UHMWPE/h-CCB<sub>15</sub>.

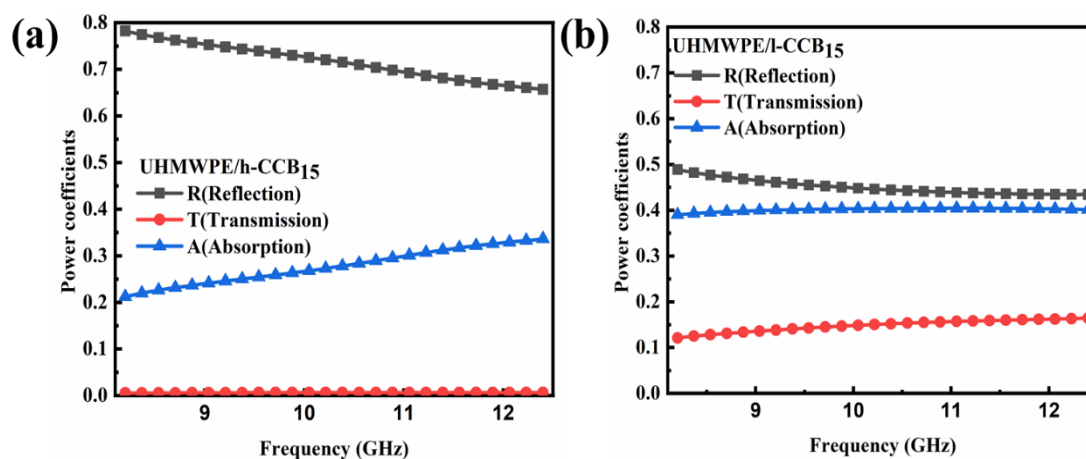

**Figure S8.** Relationship between power coefficients and frequency of the segregated (a) UHMWPE/h-CCB<sub>15</sub> and (b) UHMWPE/l-CCB<sub>15</sub> composites.

**Table S4.** comparison of  $SE_T$ ,  $SE_R$  and  $SE_A$  at the frequency of 8.2 GHz for UHMWPE/l-CCB and UHMWPE/h-CCB composites.

| Sample                     | $SE_A$ (dB) | $SE_R$ (dB) | $SE_T$ (dB) |
|----------------------------|-------------|-------------|-------------|
| UHMWPE/l-CCB <sub>1</sub>  | 0.07        | 0.26        | 0.34        |
| UHMWPE/l-CCB <sub>5</sub>  | 1.22        | 0.67        | 1.89        |
| UHMWPE/l-CCB <sub>10</sub> | 3.7         | 1.9         | 5.6         |
| UHMWPE/l-CCB <sub>15</sub> | 6.25        | 2.91        | 9.16        |
| UHMWPE/h-CCB <sub>1</sub>  | 1.91        | 2.15        | 3.05        |
| UHMWPE/h-CCB <sub>5</sub>  | 9.65        | 5.01        | 14.66       |
| UHMWPE/h-CCB <sub>10</sub> | 15.6        | 6.70        | 22.3        |
| UHMWPE/h-CCB <sub>15</sub> | 16.09       | 6.63        | 22.72       |

The obtained scattering parameters were used to calculate EMI SE values [4]:

$$T = |S_{21}|^2 = |S_{12}|^2 \quad (S3)$$

$$R = |S_{11}|^2 = |S_{22}|^2 \quad (S4)$$

$$A + R + T = 1 \quad (S5)$$

$$SE_R = -10 \log(1 - R) \quad (S6)$$

$$SE_A = -10 \log(T/1 - R) \quad (S7)$$

$$EMI\ SE = SE_R + SE_A + SE_M \text{ (} SE_M \text{ can be negligible when } SE \geq 10 \text{ dB)} \quad (S8)$$

## References

1. Sun, Z.-F.; Ren, P.-G.; Zhang, Z.-W.; Ren, F. Synergistic effects of conductive carbon nanofillers based on the ultrahigh-molecular-weight polyethylene with uniform and segregated structures. *J. Appl. Polym. Sci.* **2019**, *136*, 47317.
2. Yu, W.-C.; Xu, J.-Z.; Wang, Z.-G.; Huang, Y.-F.; Yin, H.-M.; Xu, L.; Chen, Y.-W.; Yan, D.-X.; Li, Z.-M. Constructing highly oriented segregated structure towards high-strength carbon nanotube/ultrahigh-molecular-weight polyethylene composites for electromagnetic interference shielding. *Compos. A Appl. Sci. Manuf.* **2018**, *110*, 237–245.
3. Guo, Y.; Cao, C.; Cheng, H.; Chen, Q.; Huang, B.; Luo, F.; Qian, Q. Thermal Performances of UHMWPE/BN Composites Obtained from Different Blending Methods. *Adv. Polym. Technol.* **2019**, *2019*, 1–11.
4. Cheng, H.; Cao, C.; Zhang, Q.; Wang, Y.; Liu, Y.; Huang, B.; Sun, X.-L.; Guo, Y.; Xiao, L.; Chen, Q.; Qian, Q. Enhancement of Electromagnetic Interference Shielding Performance and Wear Resistance of the UHMWPE/PP Blend by Constructing a Segregated Hybrid Conductive Carbon Black–Polymer Network. *ACS Omega* **2021**, *6*, 15078–15088.
